# Supplementary material for: Comprehensive viral enrichment enables sensitive respiratory virus genomic identification and analysis by next generation sequencing
Source: HighWire-hosted journal article supplement (doi:10.1101/gr.226316.117), 2018-04-27
Supplement: Supplemental_Legends.docx [file Supplemental_Legends.docx]

**Supplemental Material**

Supplemental Table S1. Reference and clinical samples used for enrichment studies.

Supplemental Table S2. Virus-specific probe hybridization for reference samples. Supplemental Table S3. Conserved viral group probe hybridization for reference samples. Supplemental Table S4. Sensitivity of enrichment with virus-specific probes. Supplemental Table S5. Sensitivity of enrichment with conserved viral group probes. Supplemental Table S6. Virus-specific probe hybridization for clinical samples with known viral infection. Supplemental Table S7. Conserved viral group probe hybridization for clinical samples with known viral infection. Supplemental Table S8. Targets for the design of virus-specific enriching probes. Supplemental Table S9. Real-time PCR assays used in this study.

Supplemental Table S10. Targets for the design of conserved viral group enriching probes.
