# Supplementary material for: Comprehensive viral enrichment enables sensitive respiratory virus genomic identification and analysis by next generation sequencing
Source: HighWire-hosted journal article supplement (doi:10.1101/gr.226316.117), 2018-04-27
Supplement: Supplemental_Table_S1_.docx [file Supplemental_Table_S1_.docx]

| **Supplemental Table S1. Reference and clinical samples used for enrichment studies.** | | | |
| --- | --- | --- | --- |
| **Viral family/subfamily** | **Sample type** | **Virus identitya, c** | **&**  **Viral Ct** |
| ***Coronavirinae*** | *Reference* | 229E | 22.6 |
|  |  | NL63 | 25.2 |
|  |  | TGEV | *ND b* |
|  |  | OC43 | 24.1 |
|  |  | HKU1 | 33.3 |
|  |  | MERS-CoV | 25.9 |
|  |  | IBV | *ND b* |
|  | *Clinical* | 229E (1)* | 24.6 |
|  |  | 229E (2)* | 32.0 |
|  |  | NL63 | *ND b* |
|  |  | OC43 (1)* | *ND b* |
|  |  | OC43 (2)* | 31.8 |
|  |  | HKU1 (1)* | 24.3 |
|  |  | HKU1 (2)* | 27.6 |
|  |  | cHKU23 | *ND b* |
|  |  | MERS-CoV | 24.0 |
| ***Adenoviridae*** | *Reference* | AdV A18 | 27.4 |
|  |  | AdV B11 | 23.8 |
|  |  | AdV C2 | 26.1 |
|  |  | AdV E4 | 22.1 |
|  | *Clinical* | AdV C | 17.4 |
|  |  | AdV E | 23.1 |
| ***Parvovirinae*** | *Reference* | Parvo B19 | *ND b* |
|  |  | HBoV1 | 29.1 |
|  |  | HBoV3 | 27.9 |
|  | *Clinical* | HBoV1 | *ND b* |
| ***Polyomaviridae*** | *Reference* | BKV | *ND b* |
|  | *Clinical* | TSPyV | *ND b* |
|  |  | MCPyV | *ND b* |
| ***Reoviridae*** | *Reference* | Reo T1 | *ND b* |
|  |  | Reo T2 | *ND b* |
|  |  | Reo T3 | *ND b* |
|  |  | Rota A | *ND b* |
|  |  | Rota B | *ND b* |
|  |  | Rota C | *ND b* |
|  |  | BAV | *ND b* |
|  |  | CTFV | *ND b* |
|  |  | EHDV | *ND b* |
|  |  | GIV | *ND b* |
|  |  | BCV | *ND b* |
|  | *Clinical* | Rota A | *ND b* |
| ***Picornaviridae*** | *Reference* | HPeV1 | 26.7 |

|  |  | HPeV6 | *ND b* |
| --- | --- | --- | --- |
|  |  | HRV A2 | *ND b* |
|  |  | HRV B14 | 29.8 |
|  | *Clinical* | HRV A29 | 28.5 |
|  |  | HRV A62 | 28.0 |
|  |  | HRV B14 | 30.1 |
|  |  | HRV B37 | 28.0 |
|  |  | HRV B83 | 24.3 |
|  |  | HRV C6 | 29.7 |
|  |  | HRV C30 | 29.8 |
|  |  | HRV C44 | 26.0 |
|  |  | EV-A | 20.6 |
|  |  | EV-C | 25.1 |
|  |  | CV-A21 | 19.0 |
| ***Paramyxoviridae*** | *Reference* | HPIV1 | 24.8 |
|  |  | HPIV2 | 27.1 |
|  |  | HPIV3 | 26.5 |
|  |  | CPIV2 | *ND b* |
|  |  | SV41 | *ND b* |
|  |  | CDV | *ND b* |
|  |  | MV | *ND b* |
|  |  | NDV | *ND b* |
|  | *Clinical* | HPIV1 (1)* | *ND b* |
|  |  | HPIV1 (2)* | 24.6 |
|  |  | HPIV2 (1)* | *ND b* |
|  |  | HPIV2 (2)* | 20.6 |
|  |  | HPIV3 | 25.5 |
|  |  | HPIV4 (1)* | *ND b* |
|  |  | HPIV4 (2)* | 27.9 |
|  |  | MV | *17.8* |
| ***Pneumoviridae*** | *Reference* | RSV A2 | 24.7 |
|  |  | RSV B1 | 28.3 |
|  |  | HMPV75 | 25.5 |
|  |  | HMPV83 | 28.3 |
|  | *Clinical* | RSVA | *ND b* |
|  |  | RSVB | 23.5 |
|  |  | HMPV | 23.2 |
| ***Orthomyxoviridae*** | *Reference* | Flu A A/California/07/2009 (H1N1) | 21.2 |
|  |  | Flu A A/New Caledonia20/99 (H1N1) | 22.6 |
|  |  | Flu A A/Turkey/Kansas/4880/80 (H1N1) | 24.2 |
|  |  | Flu A A/Sydney/05/97 (H3N2) | 26.4 |
|  |  | Flu A A/Turkey/England/69 (H3N2) | 22.4 |
|  |  | Flu A A/Duck/HongKong (H5N1) | 24.5 |
|  |  | Flu A A/Chicken/HongKong (H9N2) | 25.8 |
|  |  | Flu B Yamagata/16/88 | 29.2 |

|  | Flu B HongKong/330/01 | 28.1 |
| --- | --- | --- |
|  | Flu B Shizuoka/15/01 | 28.3 |
|  | Flu B Victoria/87 | 26.2 |
| *Clinical* | Flu A (H1 serotype) | 22.3 |
|  | Flu A (H3 serotype) | 26.5 |
|  | Flu B Victoria | 20.2 |
|  | Flu B Yamagata | 27.8 |
| a TGEV, transmissible gastroenteritis coronavirus; MERS-CoV, Middle East respiratory syndrome coronavirus; IBV, avian infectious bronchitis virus; cHKU23, camel coronavirus  HKU23; AdV, adenovirus; HBoV1, human bocavirus 1; HBoV3, human bocavirus 3; BKV, BK polyomavirus; TSPyV, trichodysplasia spinulosa-associated polyomavirus; MCPyV, merkel cell polyomavirus; Reo T1,T2,T3, mammalian orthoreovirus type 1,2,3; Rota, rotavirus; BAV, Banna virus; CTFV, Colorado tick fever virus; EHDV, epizootic hemorrhagic disease virus; GIV, Great Island virus; BCV, Bunyip Creek virus; HPeV1,6, human parechovirus1,6; HRV, human rhinovirus; EV, enterovirus; CV-A21, coxsackievirus A21; HPIV1,2,3,4, human parainfluenza virus 1,2,3,4; CPIV2, canine parainfluenza virus 2; SV41, simian virus 41; CDV, canine distemper virus; MV, measles virus; NDV, Newcastle disease virus; RSV, respiratory syncytial virus; HMPV, human metapneumovirus; Flu A, influenza A virus; Flu B, influenza B virus.  & Approximate viral Ct  * Numbers with parentheses indicate different samples tested for the same virus  b ND, no data for viral Ct | | |

**C** Abbreviated as below to use in figures: A/California/07/2009 (H1N1): CA; A/New Caledonia20/99

(H1N1): NC; A/Turkey/Kansas/4880/80 (H1N1): Tky/KS; A/Sydney/05/97 (H3N2): Sydney;

A/Turkey/England/69 (H3N2): Tky/Eng; A/Duck/HongKong (H5N1): DK/HK; A/Chicken/HongKong

(H9N2): CK/HK; Flu B Yamagata/16/88: Yamagata; Flu B HongKong/330/01: HK; Flu B Shizuoka/15/01:

Shizuoka; Flu B Victoria/87: Victoria.
