# Supplementary material for: Comprehensive viral enrichment enables sensitive respiratory virus genomic identification and analysis by next generation sequencing
Source: HighWire-hosted journal article supplement (doi:10.1101/gr.226316.117), 2018-04-27
Supplement: Supplemental_Table_S2.docx [file Supplemental_Table_S2.docx]

# Supplemental Table S2. Virus-specific probe hybridization for reference samples.

**Targeted viral reads Genome coverage**

**Viral**

| **Sample type** | **family/subfamily** | **Virus identitya** | **Genus/serotype** | **Viral C &** | **Non-hybridized** | **Hybridized** | **Non-hybridized** | **Hybridized** | **Non-hybridized** | **Hybridized** | **PTRb fold increasec *** | **Non-hybridized** | **Hybridized** | **Non-hybridized** | **Hybridized** |
| --- | --- | --- | --- | --- | --- | --- | --- | --- | --- | --- | --- | --- | --- | --- | --- |
| Reference | *Coronavirinae* | 229E | *Alphacoronavirus* | 22.6 | 1,185,389 | 2,071,577 | 353 | 2,044,689 | 0.03 | 98.70 | 3,314 | 82.9 | 99.8 | 4.2 | 28551.1 |
| Reference |  | NL63 | *Alphacoronavirus* | 25.2 | 853,042 | 219,234 | 28 | 210,703 | 0.00 | 96.11 | 29,280 | 14.5 | 99.6 | 0.3 | 2936.0 |
| Reference |  | OC43 | *Betacoronavirus* | 24.1 | 945,176 | 148,679 | 16 | 135,959 | 0.00 | 91.44 | 54,020 | 10.9 | 100.0 | 0.2 | 1690.6 |
| Reference |  | HKU1 | *Betacoronavirus* | 33.3 | 655,955 | 8,458 | 0 | 626 | 0.00 | 7.40 | ‡ | 0.0 | 37.0 | 0.0 | 8.0 |
| Reference | *Adenoviridae* | AdV B11 | *Mastadenovirus* | 23.8 | 1,056,991 | 7,417 | 5 | 1,821 | 0.00 | 24.55 | 51,902 | 1.0 | 44.4 | 0.0 | 14.4 |
| Reference |  | AdV C2 | *Mastadenovirus* | 26.1 | 748,977 | 7,488 | 5 | 99 | 0.00 | 1.32 | 1,980 | 0.0 | 1.8 | 0.0 | 0.0 |
| Reference |  | AdV E4 | *Mastadenovirus* | 22.1 | 1,334,444 | 3,471,538 | 1,457 | 3,151,237 | 0.11 | 90.77 | 831 | 75.1 | 99.9 | 11.4 | 30216.5 |
| Reference | *Parvovirinae* | HBoV1 | *Bocaparvovirus* | 29.1 | 87 | 2,025 | 0 | 5 | 0.00 | 0.25 | ‡ | 0.0 | 4.7 | 0.0 | 0.3 |
| Reference |  | HBoV3 | *Bocaparvovirus* | 27.9 | 687,723 | 2,485 | 0 | 117 | 0.00 | 4.71 | ‡ | 0.0 | 48.8 | 0.0 | 8.1 |
| Reference | *Picornaviridae* | HPeV1 | *Parechovirus* | 26.7 | 1,170,491 | 49,529 | 73 | 22,503 | 0.01 | 45.43 | 7,285 | 24.7 | 56.8 | 0.8 | 421.9 |
| Reference |  | HPeV6 | *Parechovirus* | *ND d* | 1,083,091 | 3,849,098 | 993 | 3,816,245 | 0.09 | 99.15 | 1,082 | 99.0 | 96.3 | 30.0 | 183097.0 |
| Reference |  | HRV B14 | *Enterovirus* | 29.8 | 1,008,790 | 418,751 | 134 | 414,562 | 0.01 | 99.00 | 7,453 | 80.6 | 95.9 | 4.4 | 21231.7 |
| Reference | *Paramyxoviridae* | HPIV1 | *Respirovirus* | 24.8 | 1,078,392 | 137,585 | 43 | 128,582 | 0.00 | 93.46 | 23,438 | 34.9 | 99.8 | 0.9 | 2991.8 |
| Reference |  | HPIV3 | *Respirovirus* | 26.5 | 793,899 | 70,157 | 9 | 62,953 | 0.00 | 89.73 | 79,153 | 4.0 | 99.8 | 0.0 | 1569.4 |
| Reference |  | HPIV2 | *Rubulavirus* | 27.1 | 803,566 | 526,680 | 19 | 518,975 | 0.00 | 98.54 | 41,674 | 14.5 | 100.0 | 0.3 | 12408.6 |
| Reference | *Pneumoviridae* | RSV A2 | *Orthopneumovirus* | 24.7 | 1,202,917 | 893,289 | 144 | 861,254 | 0.01 | 96.41 | 8,054 | 68.5 | 99.8 | 2.8 | 20511.4 |
| Reference |  | RSV B1 | *Orthopneumovirus* | 28.3 | 1,271,991 | 278,865 | 146 | 250,537 | 0.01 | 89.84 | 7,827 | 51.5 | 99.2 | 1.5 | 6449.6 |
| Reference |  | HMPV75 | *Metapneumovirus* | 25.5 | 968,343 | 13,775 | 97 | 5,731 | 0.01 | 41.60 | 4,175 | 11.7 | 32.2 | 0.3 | 33.9 |
| Reference |  | HMPV83 | *Metapneumovirus* | 28.3 | 1,009,354 | 137,359 | 5 | 127,934 | 0.00 | 93.14 | 188,019 | 6.4 | 99.8 | 0.1 | 3619.0 |
| Reference | *Orthomyxoviridae* | Flu A California/07/2009 | H1N1 (human) | 21.2 | 1,917,916 | 10,884,355 | 118,391 | 9,555,368 | 6.17 | 87.79 | 14 | 95.3 | 98.0 | 1715.6 | 125803.2 |
| Reference |  | Flu A New Caledonia/20/99 | H1N1 (human) | 22.6 | 672,158 | 739,656 | 2,736 | 686,587 | 0.41 | 92.83 | 228 | 58.0 | 99.3 | 72.2 | 17152.8 |
| Reference |  | Flu A Sydney/05/97 | H3N2 (human) | 26.4 | 1,177,036 | 3,537,605 | 913 | 3,518,996 | 0.08 | 99.47 | 1,282 | 98.3 | 99.8 | 20.8 | 102724.5 |
| Reference |  | Flu Turkey/England/69 | H3N2 (avian) | 22.4 | 1,151,592 | 2,118,134 | 10,789 | 1,997,514 | 0.94 | 94.31 | 101 | 36.9 | 88.4 | 15.0 | 5390.9 |
| Reference |  | Flu A Duck/HongKong | H5N1 (avian) | 24.5 | 765,237 | 1,379,122 | 23,003 | 1,362,864 | 3.01 | 98.82 | 33 | 57.1 | 95.6 | 542.2 | 32831.1 |
| Reference |  | Flu B Yamagata/16/88 |  | 29.2 | 842,565 | 485,291 | 188 | 437,194 | 0.02 | 90.09 | 4,038 | 74.1 | 100.0 | 3.2 | 12826.4 |
| Reference |  | Flu B Victoria/87 |  | 26.2 | 1,501,118 | 15,773 | 4 | 923 | 0.00 | 5.85 | 21,961 | 3.1 | 89.9 | 0.1 | 27.9 |

**Total (filtered) reads Targeted viral reads (no.) Targeted viral reads (%)**

**Linear genome coverage (%) Average depth of coverage**

**t**

a AdV, adenovirus; HBoV1,3, human bocavirus1,3; HPeV1,6, human parechovirus1,6; HRV, human rhinovirus; HPIV1,2,3, human parainfluenza virus 1,2,3; RSV, respiratory syncytial virus; HMPV75, human metapneumovirus 75; HMPV83, human metapneumovirus 83; Flu A, influenza A virus; Flu B, influenza B virus

b Percent targeted viral reads abbreviated as PTR

c PTR fold increase indicates PTR of hybridizaed divided by PTR of non-hybridized

‡ PTR fold increase could not be calculated due to lack of pre-capture reads

* Median fold increase in PTR, 7,285

& Approximate viral Ct
