# Supplementary material for: Comprehensive viral enrichment enables sensitive respiratory virus genomic identification and analysis by next generation sequencing
Source: HighWire-hosted journal article supplement (doi:10.1101/gr.226316.117), 2018-04-27
Supplement: Supplemental_Table_S3.docx [file Supplemental_Table_S3.docx]

| **Supplemental Table S3. Conserved viral group probe hybridization for reference samples.** | | | | | | | | | | |
| --- | --- | --- | --- | --- | --- | --- | --- | --- | --- | --- |
| **Targeted viral reads** | | | | | | | | | | |
|  |  |  |  | **Total (filtered) reads** | | **Targeted viral reads (no.)** | | **Targeted viral reads (%)** | |  |
| **Sample type** | **Viral family/subfamily** | **Virus identitya** | **Genus/serotype** | **Non-hybridized** | **Hybridized** | **Non-hybridized** | **Hybridized** | **Non-hybridized** | **Hybridized** | **PTRb fold increasec *** |
| Reference | *Coronavirinae* | 229E | *Alphacoronavirus* | 824,348 | 137,340 | 155 | 1,928 | 0.02 | 1.40 | 75 |
| Reference |  | NL63 | *Alphacoronavirus* | 476,539 | 17,879 | 8 | 3,489 | 0.00 | 19.52 | 11,625 |
| Reference |  | TGEV | *Alphacoronavirus* | 456,049 | 219,248 | 135 | 205,280 | 0.03 | 93.63 | 3,163 |
| Reference |  | OC43 | *Betacoronavirus* | 710,557 | 461,921 | 9 | 171,137 | 0.00 | 37.05 | 28,206 |
| Reference |  | HKU1 | *Betacoronavirus* | 835,076 | 4,185 | 0 | 57 | 0.00 | 1.36 | ‡ |
| Reference |  | MERS-CoV | *Betacoronavirus* | 677,444 | 62,532 | 25 | 51,405 | 0.00 | 82.21 | 22,731 |
| Reference |  | IBV | *Gammacoronavirus* | 699,107 | 352,406 | 2,467 | 323,737 | 0.35 | 91.86 | 260 |
| Reference | *Adenoviridae* | AdV A18 | *Mastadenovirus* | 605,137 | 219,290 | 11 | 175,225 | 0.00 | 79.91 | 43,958 |
| Reference |  | AdV B11 | *Mastadenovirus* | 705,863 | 30,197 | 3 | 14,691 | 0.00 | 48.65 | 137,365 |
| Reference |  | AdV C2 | *Mastadenovirus* | 447,594 | 178,655 | 1 | 111,566 | 0.00 | 62.45 | 279,512 |
| Reference |  | AdV E4 | *Mastadenovirus* | 643,738 | 460,639 | 65 | 445,654 | 0.01 | 96.75 | 9,656 |
| Reference | *Parvovirinae* | Parvo B19 | *Bocaparvovirus* | 980,217 | 64,179 | 25 | 62,832 | 0.00 | 97.90 | 39,169 |
| Reference |  | HBoV1 | *Bocaparvovirus* | 819,690 | 2,210 | 0 | 61 | 0.00 | 2.76 | ‡ |
| Reference |  | HBoV3 | *Bocaparvovirus* | 666,091 | 1,789 | 0 | 126 | 0.00 | 7.04 | ‡ |
| Reference | *Reoviridae* | Reo T1 | *Orthoreovirus* | 661,993 | 12,828 | 0 | 4 | 0.00 | 0.03 | ‡ |
| Reference |  | Reo T2 | *Orthoreovirus* | 486,119 | 38,755 | 6 | 22,134 | 0.00 | 57.11 | 46,273 |
| Reference |  | Reo T3 | *Orthoreovirus* | 312,566 | 24,831 | 5 | 8,540 | 0.00 | 34.39 | 21,500 |
| Reference |  | Rota A | *Rotavirus* | 2,131,465 | 1,419,612 | 19,127 | 1,080,809 | 0.90 | 76.13 | 85 |
| Reference |  | Rota B | *Rotavirus* | 607,556 | 6,388,556 | 5,665 | 6,061,352 | 0.93 | 94.88 | 102 |
| Reference |  | Rota C | *Rotavirus* | 815,944 | 41,972 | 4,272 | 24,104 | 0.52 | 57.43 | 110 |
| Reference |  | BAV | *Seadornavirus* | 1,022,209 | 430,282 | 4,349 | 426,486 | 0.43 | 99.12 | 233 |
| Reference |  | CTFV | *Coltivirus* | 1,605,556 | 173,881 | 11 | 72,268 | 0.00 | 41.56 | 60,663 |
| Reference |  | EHDV | *Orbivirus* | 1,380,079 | 70,751 | 19 | 0 | 0.00 | 0.00 | 0 |
| Reference |  | GIV | *Orbivirus* | 1,789,390 | 1,439 | 458 | 0 | 0.03 | 0.00 | 0 |
| Reference |  | BCV | *Orbivirus* | 1,129,035 | 2,700 | 245 | 218 | 0.02 | 8.07 | 372 |
| Reference | *Picornaviridae* | HPeV1 | *Parechovirus* | 244 | 36,446 | 0 | 28,783 | 0.00 | 78.97 | ‡ |
| Reference |  | HPeV6 | *Parechovirus* | 1,076,545 | 2,039,722 | 21 | 2,021,760 | 0.00 | 99.12 | 52,052 |
| Reference |  | HRV A2 | *Enterovirus* | 889,490 | 275,031 | 1 | 145,561 | 0.00 | 52.93 | 470,765 |
| Reference |  | HRV B14 | *Enterovirus* | 1,018,100 | 356,221 | 37 | 331,056 | 0.00 | 92.94 | 25,572 |
| Reference | *Paramyxoviridae* | CPIV2 | *Rubulavirus* | 1,019,453 | 54,884 | 1,060 | 26,560 | 0.10 | 48.39 | 465 |
| Reference |  | SV41 | *Rubulavirus* | 964,163 | 37,424 | 9,839 | 5,653 | 1.02 | 15.11 | 15 |
| Reference |  | HPIV1 | *Respirovirus* | 702,651 | 3,790 | 32 | 2,510 | 0.00 | 66.23 | 14,542 |
| Reference |  | HPIV3 | *Respirovirus* | 524,707 | 92,000 | 6 | 52,773 | 0.00 | 57.36 | 53,114 |
| Reference |  | CDV | *Morbillivirus* | 786,377 | 18,361 | 22,789 | 14,006 | 2.90 | 76.28 | 26 |
| Reference |  | MV | *Morbillivirus* | 839,312 | 32,600 | 3,414 | 25,420 | 0.41 | 77.98 | 192 |
| Reference |  | NDV | *Avulavirus* | 532,580 | 1,006,327 | 4,202 | 999,165 | 0.79 | 99.29 | 126 |
| Reference | *Pneumoviridae* | RSV A2 | *Orthopneumovirus* | 824,332 | 51,278 | 44 | 32,320 | 0.01 | 63.03 | 11,808 |
| Reference |  | RSV B1 | *Orthopneumovirus* | 738,573 | 68,541 | 10 | 48,818 | 0.00 | 71.22 | 55,373 |
| Reference |  | HMPV75 | *Metapneumovirus* | 692,750 | 718,101 | 60 | 437,711 | 0.01 | 60.95 | 7,008 |
| Reference |  | HMPV83 | *Metapneumovirus* | 653,988 | 71,980 | 4 | 57,358 | 0.00 | 79.69 | 130,284 |
| Reference | *Orthomyxoviridae* | Flu A California/07/2009 | H1N1 (human) | 978,154 | 12,364,780 | 61,209 | 11,849,651 | 6.26 | 95.83 | 15 |
| Reference |  | Flu A New Caledonia/20/99 | H1N1 (human) | 670,603 | 662,195 | 1,069 | 627,135 | 0.16 | 94.71 | 594 |
| Reference |  | Flu A Turkey/Kansas/4880/80 | H1N1 (avian) | 670,764 | 823,903 | 27 | 439,239 | 0.00 | 53.31 | 13,494 |
| Reference |  | Flu A Sydney/05/97 | H3N2 (human) | 782,474 | 1,452,679 | 203 | 1,363,644 | 0.03 | 93.87 | 3,618 |
| Reference |  | Flu A Turkey/England/69 | H3N2 (avian) | 1,693,747 | 1,284,727 | 258 | 1,237,885 | 0.02 | 96.35 | 6,326 |
| Reference |  | Flu A Duck/Hong Kong | H5N1 (avian) | 805,200 | 1,150,998 | 96 | 1,142,262 | 0.01 | 99.24 | 8,324 |
| Reference |  | Flu A Chicken/Hong Kong | H9N2 (avian) | 540,316 | 65,245 | 134 | 62,549 | 0.02 | 95.87 | 3,880 |
| Reference |  | Flu B Yamagata/16/88 |  | 1,306,895 | 678,017 | 1 | 628,513 | 0.00 | 92.70 | 1,211,475 |
| Reference |  | Flu B Hong Kong/330/01 |  | 1,104,623 | 6,908 | 0 | 1,724 | 0.00 | 24.96 | ‡ |
| Reference |  | Flu B Shizuoka/15/01 |  | 1,059,227 | 4,314 | 0 | 2,424 | 0.00 | 56.19 | ‡ |
| Reference |  | Flu B Victoria/87 |  | 917,083 | 10,137 | 4 | 4,865 | 0.00 | 47.99 | 110,033 |
| Reference | *Polyomaviridae* | BKV | *Betapolyomavirus* | 266,343 | 92 | 0 | 0 | 0.00 | 0.00 | ‡ |
| a TGEV, transmissible gastroenteritis coronavirus; MERS-CoV, Middle East respiratory syndrome coronavirus; IBV, avian infectious bronchitis virus; AdV, adenovirus; Parvo B19, human parvovirus B19; HBoV1,3, human bocavirus 1,3; Reo T1,T2,T3, mammalian orthoreovirus type 1,2,3; Rota A, B, C, rotavirus A,B,C; BAV, Banna virus; CTFV, Colorado tick fever virus; EHDV, epizootic hemorrhagic disease virus; GIV, Great Island virus; BCV, Bunyip Creek virus; HPeV1,6, human parechovirus 1,6; HRV, human rhinovirus, CPIV2, canine parainfluenza virus 2; SV41, simian virus 41; HPIV1,3, human parainfluenza virus 1, 3; CDV, canine distemper virus; MV, measles virus; NDV, Newcastle disease virus; RSV, respiratory syncytial virus; HMPV75, human metapneumovirus 75; HMPV83, human metapneumovirus 83; Flu A, influenza A virus; Flu B, influenza B virus, BKV, BK polyomavirus. | | | | | | | | | | |
| b Percent targeted viral reads abbreviated as PTR | | | | | | | | | | |
| c PTR fold increase indicates PTR of hybridized divided by PTR of non-hybridized | | | | | | | | | | |
| ‡ PTR fold increase could not be calculated due to lack of pre-capture reads | | | | | | | | | | |
| * Median fold increase in PTR, 8,990 | | | | | | | | | | |
