# Supplementary material for: Comprehensive viral enrichment enables sensitive respiratory virus genomic identification and analysis by next generation sequencing
Source: HighWire-hosted journal article supplement (doi:10.1101/gr.226316.117), 2018-04-27
Supplement: Supplemental_Table_S4.docx [file Supplemental_Table_S4.docx]

Supplemental Table S4. Sensitivity of enrichment with virus-specific probes.

Targeted viral reads Genome coverage

Viral

**& Genus/serotype**

Total (filtered) reads

Targeted viral reads (pos. or neg.*)

Targeted viral reads (%)

Linear genome coverage (%)b

Fold increase in linear

Average depth of coverage

Sample type

**family/subfamily Virus identitya Viral Ct**

Non-hybridized Hybridized Non-hybridized Hybridized Non-hybridized Hybridized Non-hybridized Hybridized

genome coverage Non-hybridized Hybridized

| Reference | *Coronavirinae* | OC43 | 24.1 | *Betacoronavirus* | 1,018,665 | 706,375 | 109 (pos) | 687,413 (pos) | 0.01 | 97.32 | 44.9% | 100.0% | *2.2* | 1.1 | 8361.6 |
| --- | --- | --- | --- | --- | --- | --- | --- | --- | --- | --- | --- | --- | --- | --- | --- |
| Reference |  |  | 28.7 | *Betacoronavirus* | 1,062,090 | 75,409 | 14 (neg) | 42,183 (pos) | 0.00 | 55.94 | 4.5% | 99.4% | *22.1* | 0.1 | 528.2 |
| Reference |  |  | 32.2 | *Betacoronavirus* | 1,017,008 | 16,973 | 5 (neg) | 2,158 (pos) | 0.00 | 12.71 | 0.5% | 51.1% | *102.2* | 0.0 | 26.0 |
| Reference |  |  | 36 | *Betacoronavirus* | 1,042,909 | 9,367 | 7 (neg) | 137 (pos) | 0.00 | 1.46 | 3.7% | 8.4% | *2.3* | 0.1 | 1.8 |
| Reference | *Adenoviridae* | AdV E4 | 22.1 | *Mastadenovirus* | 1,334,444 | 3,471,538 | 1,457 (pos) | 3,151,237 (pos) | 0.11 | 90.77 | 75.0% | 99.9% | *1.3* | 11.4 | 30216.5 |
| Reference |  |  | 27.2 | *Mastadenovirus* | 1,329,003 | 165,867 | 121 (neg) | 113,799 (pos) | 0.01 | 68.61 | 23.6% | 98.0% | *4.2* | 1.1 | 1096.4 |
| Reference |  |  | 29 | *Mastadenovirus* | 1,440,996 | 23,439 | 12 (neg) | 18,018 (pos) | 0.00 | 76.87 | 1.4% | 86.1% | *61.5* | 0.0 | 174.4 |
| Reference |  |  | 32.6 | *Mastadenovirus* | 970,906 | 3,818 | 4 (neg) | 1,475 (pos) | 0.00 | 38.63 | 0.3% | 55.3% | *184.3* | 0.0 | 14.1 |
| Reference | *Pneumoviridae* | RSV A2 | 24.7 | *Orthopneumovirus* | 1,288,074 | 670,621 | 147 (pos) | 647,611 (pos) | 0.01 | 96.57 | 71.8% | 99.9% | *1.4* | 2.8 | 15460.1 |
| Reference |  |  | 29.5 | *Orthopneumovirus* | 1,018,207 | 56,994 | 10 (neg) | 40,695 (pos) | 0.00 | 71.40 | 2.0% | 97.7% | *48.9* | 0.0 | 938.3 |
| Reference |  |  | 34.5 | *Orthopneumovirus* | 1,187,083 | 23,380 | 3 (neg) | 1,160 (pos) | 0.00 | 4.96 | 0.0% | 58.7% | ‡ | 0.0 | 26.6 |
| Reference |  |  | 38.8 | *Orthopneumovirus* | 1,031,898 | 12,631 | 11 (neg) | 71 (pos) | 0.00 | 0.56 | 2.5% | 16.3% | *6.5* | 0.0 | 1.6 |
| Reference | *Orthomyxoviridae* | Flu A Sydney/05/97 | 26.4 | H3N2 (human) | 1,177,035 | 3,537,604 | 913 (pos) | 3,518,996 (pos) | 0.08 | 99.47 | 98.3% | 99.8% | *1.0* | 20.8 | 102724.5 |
| Reference |  |  | 31.7 | H3N2 (human) | 1,116,186 | 162,033 | 47 (neg) | 154,456 (pos) | 0.00 | 95.32 | 31.2% | 99.2% | *3.2* | 0.9 | 4545.9 |
| Reference |  |  | 36.1 | H3N2 (human) | 1,036,881 | 14,753 | 10 (neg) | 11,490 (pos) | 0.00 | 77.88 | 7.2% | 98.7% | *13.8* | 0.1 | 333.7 |
| Reference |  |  | 38.7 | H3N2 (human) | 1,109,522 | 4,339 | 9 (neg) | 1,348 (pos) | 0.00 | 31.07 | 1.2% | 86.8% | *74.8* | 0.0 | 38.5 |

a AdV, adenovirus; RSV, respiratory syncytial virus; Flu A, influenza A virus.

b At 10X read depth

& Approximate viral Ct

*pos: number of reads ≥ relative read count threshold (0.01%); neg: number of reads < relative read count threshold (0.01%)
