# Supplementary material for: Comprehensive viral enrichment enables sensitive respiratory virus genomic identification and analysis by next generation sequencing
Source: HighWire-hosted journal article supplement (doi:10.1101/gr.226316.117), 2018-04-27
Supplement: Supplemental_Table_S5.docx [file Supplemental_Table_S5.docx]

# Supplemental Table S5. Sensitivity of enrichment with conserved viral group probes.

**Viral**

**Targeted viral reads**

**Total (filtered) reads Targeted viral reads (pos. or neg.*) Targeted viral reads (%)**

| **Sample type** | **family/subfamily** | **Virus identitya** | **&**  **Viral Ct** | **Genus/serotype** | **Non-hybridized** | **Hybridized** | **Non-hybridized** | **Hybridized** | **Non-hybridized** | **Hybridized** |
| --- | --- | --- | --- | --- | --- | --- | --- | --- | --- | --- |
| Reference | *Coronavirinae* | OC43 | 24.1 | *Betacoronavirus* | 549,090 | 657,188 | 78 (pos) | 517,370 (pos) | 0.01 | 78.72 |
| Reference |  |  | 28.7 | *Betacoronavirus* | 853,283 | 62,661 | 0 (neg) | 43,576 (pos) | 0.00 | 69.54 |
| Reference |  |  | 32.2 | *Betacoronavirus* | 815,414 | 187,067 | 0 (neg) | 999 (pos) | 0.00 | 0.53 |
| Reference |  |  | 36 | *Betacoronavirus* | 471,776 | 21,736 | 0 (neg) | 2 (neg) | 0.00 | 0.01 |
| Reference | *Adenoviridae* | AdV E4 | 22.1 | *Mastadenovirus* | 939,907 | 2,076,139 | 813 (pos) | 2,068,296 (pos) | 0.09 | 99.62 |
| Reference |  |  | 27.2 | *Mastadenovirus* | 904,824 | 76,991 | 68 (neg) | 73,661 (pos) | 0.01 | 95.67 |
| Reference |  |  | 29 | *Mastadenovirus* | 820,205 | 15,426 | 1 (neg) | 12,127 (pos) | 0.00 | 78.61 |
| Reference |  |  | 32.6 | *Mastadenovirus* | 747,260 | 4,806 | 1 (neg) | 1,187 (pos) | 0.00 | 24.70 |
| Reference | *Pneumoviridae* | RSV A2 | 24.7 | *Orthopneumovirus* | 559,269 | 232,187 | 56 (pos) | 181,200 (pos) | 0.01 | 78.04 |
| Reference |  |  | 29.5 | *Orthopneumovirus* | 795,285 | 66,389 | 1 (neg) | 7,932 (pos) | 0.00 | 11.95 |
| Reference |  |  | 34.5 | *Orthopneumovirus* | 692,771 | 56,570 | 0 (neg) | 581 (pos) | 0.00 | 1.03 |
| Reference |  |  | 38.8 | *Orthopneumovirus* | 628,557 | 38,411 | 2 (neg) | 1 (neg) | 0.00 | 0.00 |
| Reference | *Orthomyxoviridae* | Flu A Sydney/05/97 | 26.4 | H3N2 (human) | 883,874 | 2,554,764 | 533 (pos) | 2,534,826 (pos) | 0.06 | 99.22 |
| Reference |  |  | 31.7 | H3N2 (human) | 900,764 | 113,211 | 27 (neg) | 106,211 (pos) | 0.00 | 93.82 |
| Reference |  |  | 36.1 | H3N2 (human) | 786,601 | 9,317 | 4 (neg) | 6,655 (pos) | 0.00 | 71.43 |
| Reference |  |  | 38.7 | H3N2 (human) | 844,513 | 2,455 | 0 (neg) | 746 (pos) | 0.00 | 30.39 |

a AdV, adenovirus; RSV, respiratory syncitial virus; Flu A, influenza A virus.

& Approximate viral Ct

* pos: number of reads ≥ relative read count threshold (0.01%); neg: number of reads < relative read count threshold (0.01%)
