# Supplementary material for: Comprehensive viral enrichment enables sensitive respiratory virus genomic identification and analysis by next generation sequencing
Source: HighWire-hosted journal article supplement (doi:10.1101/gr.226316.117), 2018-04-27
Supplement: Supplemental_Table_S6.docx [file Supplemental_Table_S6.docx]

# Supplemental Table S6. Virus-specific probe hybridization for clinical samples with known viral infection.

**Targeted viral reads Genome coverage**

**Viral**

**Total (filtered) reads Targeted viral reads (no.) Targeted viral reads (%)**

**Linear genome coverage (%) Average depth of coverage**

| **&**  **Sample type family/subfamily Virus identitya Genus/serotype Viral Ct Non-hybridized** | | | | | | **Hybridized** | **Non-hybridized** | **Hybridized** | **Non-hybridized** | **Hybridized** | **PTRb fold increasec *** | **Non-hybridized** | **Hybridized** | **Non-hybridized** | **Hybridized** |
| --- | --- | --- | --- | --- | --- | --- | --- | --- | --- | --- | --- | --- | --- | --- | --- |
| Clinical | *Coronavirinae* | 229E (1)* | *Alphacoronavirus* | 24.6 | 247,047 | 231,449 | 231 | 230,776 | 0.09 | 99.71 | 1,066 | 47.9 | 69.2 | 2.1 | 3214.1 |
| Clinical |  | NL63 | *Alphacoronavirus* | *ND d* | 421,214 | 40,212 | 9 | 35,598 | 0.00 | 88.53 | 41,431 | 4.6 | 24.8 | 0.1 | 557.0 |
| Clinical |  | OC43 (1)* | *Betacoronavirus* | *ND d* | 5,007,236 | 2,173,521 | 38,910 | 2,166,707 | 0.78 | 99.69 | 128 | 100.0 | 100.0 | 418.6 | 27596.1 |
| Clinical |  | OC43 (2)* | *Betacoronavirus* | 31.8 | 681,105 | 962,169 | 2,218 | 890,530 | 0.33 | 92.55 | 284 | 98.4 | 100.0 | 21.0 | 9577.0 |
| Clinical |  | HKU1 (1)* | *Betacoronavirus* | 24.3 | 655,246 | 15,714 | 917 | 10,566 | 0.14 | 67.24 | 480 | 10.4 | 82.0 | 0.2 | 129.6 |
| Clinical | *Adenoviridae* | AdV C | *Mastadenovirus* | 17.4 | 1,663,051 | 175,328 | 142 | 174,632 | 0.01 | 99.60 | 11,665 | 53.0 | 99.9 | 1.7 | 2212.8 |
| Clinical |  | AdV E | *Mastadenovirus* | 23.1 | 1,253,512 | 12,968 | 15 | 11,261 | 0.00 | 86.84 | 72,567 | 5.1 | 68.1 | 0.1 | 117.1 |
| Clinical | *Parvovirinae* | HBoV1 | *Bocaparvovirus* | 29.1 | 1,395,931 | 1,566 | 0 | 878 | 0.00 | 56.07 | ‡ | 0.0 | 28.9 | 0 | 80.6 |
| Clinical | *Picornaviridae* | HRV A62 | *Enterovirus* | 28.0 | 898,850 | 2281 | 0 | 0 | 0.00 | 0.00 | ‡ | 0.0 | 0.0 | 0 | 0 |
| Clinical |  | HRV B14 | *Enterovirus* | 30.1 | 48 | 4,211 | 0 | 830 | 0.00 | 19.71 | ‡ | 0.0 | 15.6 | 0 | 28.5 |
| Clinical |  | HRV C6 | *Enterovirus* | 29.7 | 1,081,689 | 1,863 | 1 | 0 | 0.00 | 0.00 | 0 | 0.0 | 0.0 | 0 | 0 |
| Clinical | *Paramyxoviridae* | HPIV1 (1)* | *Respirovirus* | *ND d* | 44,844 | 2,568 | 1 | 1,650 | 0.00 | 64.25 | 28,813 | 2.0 | 4.4 | 0.0 | 32.1 |
| Clinical |  | HPIV2 (1)* | *Rubulavirus* | *ND d* | 168,861 | 6,585 | 0 | 5,371 | 0.00 | 81.56 | ‡ | 0.0 | 10.7 | 0.0 | 143.5 |
| Clinical |  | HPIV3 | *Respirovirus* | 25.5 | 1,172,693 | 167,486 | 342 | 89,217 | 0.03 | 53.27 | 1,827 | 11.4 | 97.9 | 0.2 | 1916.3 |
| Clinical |  | HPIV4 (1)* | *Rubulavirus* | *ND d* | 506,347 | 7,968 | 2 | 4,290 | 0.00 | 53.84 | 136,310 | 3.2 | 83.6 | 0.0 | 98.3 |
| Clinical | *Pneumoviridae* | RSVA | *Orthopneumovirus* | *ND d* | 1,241,692 | 987,334 | 428 | 949,033 | 0.03 | 96.12 | 2,789 | 97.2 | 99.8 | 9.8 | 25013.2 |
| Clinical |  | RSVB | *Orthopneumovirus* | 23.5 | 871,997 | 337,133 | 95 | 276,486 | 0.01 | 82.01 | 7,528 | 51.5 | 99.2 | 1.54 | 6449.6 |
| Clinical |  | HMPV | *Metapneumovirus* | 23.2 | 786,172 | 9,106,155 | 1,721 | 8,892,645 | 0.22 | 97.66 | 446 | 99.0 | 99.9 | 37.2 | 241995.1 |
| Clinical | *Orthomyxoviridae* | Flu A | H1 | 22.3 | 1,134,893 | 1,046,147 | 225 | 699,481 | 0.02 | 66.86 | 3,373 | 53.6 | 85.1 | 3.1 | 10040.0 |
| Clinical |  | Flu A | H3 | 26.5 | 511,151 | 2,161,538 | 2,103 | 2,157,541 | 0.41 | 99.82 | 243 | 28.8 | 79.0 | 6.7 | 8785.9 |
| Clinical |  | Flu B Victoria |  | 20.2 | 1,601,136 | 2,333 | 111 | 1,264 | 0.01 | 54.18 | 7,815 | 9.8 | 69.5 | 0.2 | 26.9 |
| Clinical |  | Flu B Yamagata |  | 27.8 | 1,207,735 | 2,338,451 | 533 | 1,729,291 | 0.04 | 73.95 | 1,676 | 98.9 | 99.6 | 19.0 | 56802.8 |

a AdV, adenovirus; HBoV1, human bocavirus 1; HRV, human rhinovirus; HPIV1,2,3,4, human parainfluenza virus 1,2,3,4; RSV, respiratory syncytial virus; HMPV, human metapneumovirus; Flu A, influenza A virus; Flu B, influenza B virus.

b Percent targeted viral reads abbreviated as PTR

c PTR fold increase indicates PTR of hybridizaed divided by PTR of non-hybridized

‡ PTR fold increase could not be calculated due to lack of pre-capture reads

- Median fold increase in PTR, 2,308

& Approximate viral Ct

* Numbers with parentheses indicate different samples tested for the same virus

d *ND* , no data for viral Ct
