# Supplementary material for: Comprehensive viral enrichment enables sensitive respiratory virus genomic identification and analysis by next generation sequencing
Source: HighWire-hosted journal article supplement (doi:10.1101/gr.226316.117), 2018-04-27
Supplement: Supplemental_Table_S7.docx [file Supplemental_Table_S7.docx]

| **Supplemental Table S7. Conserved viral group probe hybridization for clinical samples with known viral infection.** | | | | | | | | | | | |
| --- | --- | --- | --- | --- | --- | --- | --- | --- | --- | --- | --- |
| **Targeted viral reads** | | | | | | | | | | | |
|  | **Viral family/subfamily** |  |  |  | **Total (filtered) reads** | | **Targeted viral reads (no.)** | | **Targeted viral reads (%)** | |  |
| **Sample type** | **Virus identitya** | **Genus/serotype** | **&**  **Viral Ct** | **Non-hybridized** | **Hybridized** | **Non-hybridized** | **Hybridized** | **Non-hybridized** | **Hybridized** | **PTRb fold increasec *** |
| Clinical | *Coronavirinae* | 229E (2)* | *Alphacoronavirus* | 32.0 | 595,084 | 33,260 | 0 | 0 | 0.00 | 0.00 | ‡ |
| Clinical |  | OC43 (2)* | *Betacoronavirus* | 31.8 | 564,314 | 3,116 | 14 | 2,389 | 0.00 | 76.67 | 30,904 |
| Clinical |  | HKU1 (2)* | *Betacoronavirus* | 27.6 | 873,174 | 26,951 | 12 | 14844 | 0.00 | 55.08 | 40,077 |
| Clinical |  | cHKU23 | *Betacoronavirus* | *ND* | 1,419,753 | 438,100 | 19770 | 427142 | 1.39 | 97.50 | 70 |
| Clinical |  | MERS-CoV | *Betacoronavirus* | 24.0 | 1,400,716 | 16,783 | 654 | 11,828 | 0.05 | 70.48 | 1,509 |
| Clinical | *Adenoviridae* | AdV C | *Mastadenovirus* | 17.4 | 763,766 | 963,844 | 57 | 926,708 | 0.01 | 96.15 | 12,883 |
| Clinical |  | AdV E | *Mastadenovirus* | 23.1 | 743,963 | 9,217 | 8 | 8,286 | 0.00 | 89.90 | 83,602 |
| Clinical | *Parvovirinae* | HBoV1 | *Bocaparvovirus* | 29.1 | 584,142 | 8,923 | 0 | 1,415 | 0.00 | 15.86 | ‡ |
| Clinical | *Polyomaviridae* | TSPyV | unclassified *Polyomaviridae* | *ND* | 1,031,957 | 583 | 0 | 0 | 0.00 | 0.00 | ‡ |
| Clinical |  | MCPyV | unclassified *Polyomaviridae* | *ND* | 682,963 | 23,316 | 0 | 0 | 0.00 | 0.00 | ‡ |
| Clinical | *Reoviridae* | Rota A | *Rotavirus* | *ND* | 917,726 | 4,184,637 | 36,440 | 3,414,567 | 3.97 | 81.60 | 21 |
| Clinical | *Picornaviridae* | HRV A29 | *Enterovirus* | 28.5 | 1,268,843 | 367,815 | 22 | 184,369 | 0.00 | 50.13 | 28,910 |
| Clinical |  | HRV A62 | *Enterovirus* | 28.0 | 903,538 | 349,444 | 13 | 179,171 | 0.00 | 51.27 | 35,636 |
| Clinical |  | HRV B14 | *Enterovirus* | 30.1 | 839,334 | 118,835 | 0 | 115,976 | 0.00 | 97.59 | ‡ |
| Clinical |  | HRV B37 | *Enterovirus* | 28.0 | 938,439 | 144,899 | 40 | 107,459 | 0.00 | 74.16 | 17,399 |
| Clinical |  | HRV B83 | *Enterovirus* | 24.3 | 866,298 | 748,297 | 83 | 372,083 | 0.01 | 49.72 | 5,190 |
| Clinical |  | HRV C6 | *Enterovirus* | 29.7 | 1,037,954 | 57,617 | 2 | 19,392 | 0.00 | 33.66 | 174,671 |
| Clinical |  | HRV C30 | *Enterovirus* | 29.8 | 884,103 | 74,416 | 1 | 29,109 | 0.00 | 39.12 | 345,831 |
| Clinical |  | HRV C44 | *Enterovirus* | 26.0 | 940,553 | 24,374 | 1 | 8,557 | 0.00 | 35.11 | 330,201 |
| Clinical |  | EV-A | *Enterovirus* | 20.6 | 48,399 | 10,474 | 499 | 9916 | 1.03 | 94.67 | 92 |
| Clinical |  | EV-C | *Enterovirus* | 25.1 | 2,000 | 54,275 | 25 | 53234 | 1.25 | 98.08 | 78 |
| Clinical |  | CV-A21 | *Enterovirus* | 19.0 | 1,263,384 | 187,514 | 2 | 164527 | 0.00 | 87.74 | 554,254 |
| Clinical | *Paramyxoviridae* | HPIV1 (2)* | *Respirovirus* | 24.6 | 666,406 | 9,677 | 2,011 | 4,861 | 0.30 | 50.23 | 166 |
| Clinical |  | HPIV3 | *Respirovirus* | 25.5 | 1,193,706 | 45,631 | 14 | 39,710 | 0.00 | 87.02 | 74,201 |
| Clinical |  | HPIV2 (2)* | *Rubulavirus* | 20.6 | 482,395 | 6,451 | 711 | 670 | 0.15 | 10.39 | 70 |
| Clinical |  | HPIV4 (2)* | *Rubulavirus* | 27.9 | 1,053,874 | 46,894 | 28 | 37,714 | 0.00 | 80.42 | 30,270 |
| Clinical |  | MV | *Morbillivirus* | 17.8 | 386,260 | 12,062 | 2,307 | 11,774 | 0.60 | 97.61 | 163 |
| Clinical | *Pneumoviridae* | RSVB | *Orthopneumovirus* | 23.5 | 745,355 | 891,786 | 109 | 790,649 | 0.01 | 88.66 | 6,063 |
| Clinical |  | HMPV | *Metapneumovirus* | 23.2 | 759,364 | 1,483,780 | 54 | 1,382,752 | 0.01 | 93.19 | 13,105 |
| Clinical | *Orthomyxoviridae* | Flu A | H1 | 22.3 | 1,012,446 | 1,847,760 | 294 | 1,689,919 | 0.03 | 91.46 | 3,150 |
| Clinical |  | Flu A | H3 | 26.5 | 364,770 | 1,028,638 | 1,266 | 1,025,446 | 0.35 | 99.69 | 287 |
| Clinical |  | Flu B Victoria |  | 20.2 | 667,156 | 8,503 | 6 | 4,146 | 0.00 | 48.76 | 54,217 |
| Clinical |  | Flu B Yamagata |  | 27.8 | 1,144,513 | 2,459,075 | 6 | 2,140,589 | 0.00 | 87.05 | 166,047 |
| a cHKU23, camel coronavirus HKU23; MERS-CoV, Middle East respiratory syndrome coronavirus; AdV, adenovirus; HBoV1, human bocavirus 1; TSPyV, trichodysplasia spinulosa-associated polyomavirus; MCPyV, merkel cell polyomavirus; Rota A, rotavirus A; HRV, human rhinovirus; EV, enterovirus; CV-A21, coxsackievirus A21; HPIV1,2,3,4, human parainfluenza virus 1,2,3,4; MV, measles virus; RSV, respiratory syncytial virus; HMPV, human metapneumovirus; Flu A, influenza A virus; Flu B, influenza B virus. | | | | | | | | | | | |
| b Percent targeted viral reads abbreviated as PTR | | | | | | | | | | | |
| c PTR fold increase indicates percentage of post capture target reads divided by percentage of precapture target reads | | | | | | | | | | | |
| ‡ PTR fold increase could not be calculated due to lack of pre-capture reads | | | | | | | | | | | |
| * Numbers with parentheses indicate different samples tested for the same virus | | | | | | | | | | | |
| * median fold increase in PTR, 15,252 | | | | | | | | | | | |
| & Approximate viral Ct | | | | | | | | | | | |
| d *ND* , no data for viral Ct | | | | | | | | | | | |
