# Supplementary material for: Comprehensive viral enrichment enables sensitive respiratory virus genomic identification and analysis by next generation sequencing
Source: HighWire-hosted journal article supplement (doi:10.1101/gr.226316.117), 2018-04-27
Supplement: Supplemental_Table_S8.docx [file Supplemental_Table_S8.docx]

| **Supplemental Table S8. Targets for the design of virus-specific enriching probes.** | | | |
| --- | --- | --- | --- |
| **Viral family/subfamily** | **Genus** | **Virus description** | **Accession number** |
| ***Coronavirinae*** | *Alphacoronavirus* | Human coronavirus 229E | NC_002645.1 |
|  |  | Human coronavirus NL63 | NC_005831.2 |
|  | *Betacoronavirus* | Human coronavirus OC43 | AY391777.1 |
|  |  | Human coronavirus HKU1 | NC_006577.2 |
| ***Adenoviridae*** | *Mastadenovirus* | Human adenovirus B1 | NC_011203.1 |
|  |  | Human adenovirus C2 | NC_001405.1 |
|  |  | Human adenovirus E4 | NC_003266.2 |
| ***Parvovirinae*** | *Bocaparvovirus* | Human bocavirus 1 (Primate bocaparvovirus 1 isolate st2) | NC_007455.1 |
|  |  | Human bocavirus 2c PK isolate PK-5510 | NC_012042.1 |
|  |  | Human bocavirus 3 | NC_012564.1 |
|  |  | Human bocavirus 4 NI strain HBoV4-NI-385 | NC_012729.2 |
| ***Polyomavidae*** | *Betapolyomavirus* | KI polyomavirus Stockholm 60 | NC_009238.1 |
|  | *Betapolyomavirus* | WU Polyomavirus | NC_009539.1 |
| ***Picornaviridae*** | *Parechovirus* | Human parechovirus type 1 PicoBank/HPeV1/a | FM242866.1 |
|  |  | Human parechovirus 6 | AB252582.1 |
|  | *Enterovirus* | Human rhinovirus A89 | NC_001617.1 |
|  |  | Human rhinovirus C (strain 024) | NC_009996.1 |
|  |  | Human rhinovirus B14 | NC_001490.1 |
|  |  | Human enterovirus C104 strain: AK11 | AB686524.1 |
|  |  | Human enterovirus C109 isolate NICA08-4327 | GQ865517.1 |
| ***Paramyxoviridae*** | *Respirovirus* | Human parainfluenza virus 1 | NC_003461.1 |
|  |  | Human parainfluenza virus 2 | NC_003443.1 |
|  | *Rubulavirus* | Human parainfluenza virus 3 | NC_001796.2 |
|  |  | Human parainfluenza virus 4a | NC_021928.1 |
| ***Pneumoviridae*** | *Metapneumovirus* | Human metapneumovirus (CAN97-83) | NC_004148.2 |
|  | *Orthopneumovirus* | Respiratory syncytial virus (type A) | NC_001803.1 |
|  |  | Human Respiratory syncytial virus 9320 (type B) | AY353550.1 |
| ***Orthomyxoviridae*** | *Alphainfluenzavirus* | Influenza A virus (A/Puerto Rico/8/1934(H1N1)) | NC_002023.1, NC_002021.1, NC_002022.1, NC_002017.1, NC_002019.1, NC_002018.1, NC_002016.1, NC_002020.1 |
|  |  | Influenza A virus (A/Korea/426/1968(H2N2)) | NC_007378.1, NC_007375.1, NC_007376.1, NC_007374.1, NC_007381.1, NC_007382.1, NC_007377.1, NC_007380.1 |
|  |  | Influenza A virus (A/New York/392/2004(H3N2)) | NC_007373.1, NC_007372.1, NC_007371.1, NC_007366.1, NC_007369.1, NC_007368.1, NC_007367.1, NC_007370.1 |
|  |  | Influenza A virus (A/goose/Guangdong/1/1996(H5N1)) | NC_007357.1 NC_007358.1 NC_007359.1 NC_007362.1 NC_007360.1 NC_007361.1 NC_007363.1 NC_007364.1 |
|  |  | Influenza A virus (A/Zhejiang/DTID-ZJU01/2013(H7N9)) | KC885955.1, KC885956.1, KC885957.1, KC885958.1, KC885959.1, KC885960.1, KC885961.1, KC885962.1 |
|  |  | Influenza A virus (A/Hong Kong/1073/99(H9N2)) | NC_004910.1, NC_004911.1, NC_004912.1, NC_004908.1, NC_004905.2, NC_004909.1, NC_004907.1, NC_004906.1 |
|  | *Betainfluenzavirus* | Influenza B virus (B/Lee/1940) | NC_002204.1, NC_002205.1, NC_002206.1, NC_002207.1, NC_002208.1, NC_002209.1, NC_002210.1, NC_002211.1 |
