# Supplementary material for: Comprehensive viral enrichment enables sensitive respiratory virus genomic identification and analysis by next generation sequencing
Source: HighWire-hosted journal article supplement (doi:10.1101/gr.226316.117), 2018-04-27
Supplement: Supplemental_Table_S9.docx [file Supplemental_Table_S9.docx]

| **Supplemental Table S9. Real-time PCR assays used in this study.** | | | | |
| --- | --- | --- | --- | --- |
| **Assaya** | **Forward primer sequence (5'->3')** | **Reverse primer sequence (5'->3')** | **Probe sequence (5'->3')** | **Referencesb** |
| 229E | CAG TCA AAT GGG CTG ATG CA | AAA GGG CTA TAA AGA GAA TAA GGT ATT CT | CCC TGA CGA CCA CGT TGT GGT TCA | 1 |
| NL63 | GAC CAA AGC ACT GAA TAA CAT TTT CC | ACC TAA TAA GCC TCT TTC TCA ACC C | AAC ACG CT"T" CCA ACG AGG TTT CTT CAA CTG AG | 1 |
| OC43 | CGA TGA GGC TAT TCC GAC TAG GT | CCT TCC TGA GCC TTC AAT ATA GTA ACC | TCC GCC TGG CAC GGT ACT CCC T | 1 |
| HKU1 | CCT TGC GAA TGA ATG TGC T | TTG CAT CAC CAC TGC TAG TAC CAC | TGT GTG GCG GTT GCT ATT ATG TTA AGC CTG | 1 |
| MERS-CoV | GGC ACT GAG GAC CCA CGT T | TTG CGA CAT ACC CAT AAA AGC A | CCC CAA ATT GCT GAG CTT GCT CCT ACA | 2 |
| AdV | GCC CCA GTG GTC TTA CAT GCA CAT C | GCC ACG GTG GGG TTT CTA AAC TT | TG CAC CAG ACC CGG GCT CAG GTA CTC CGA | 3 |
| HBoV | TGC AGA CAA CGC YTA GTT GTT T | CTG TCC CGC CCA AGA TAC A | CCA GGA TTG GGT GGA ACC TGC AAA | 4 |
| HPeV | GTA ACA SWW GCC TCT GGG SCC AAA AG | GGC CCC WGR TCA GAT CCA YAG T | HEX CCT RYG GGT ACC TYC WGG GCA TCC TTC BHQ1 | 5 |
| HRV | 1: C(P)[A] GCC [T]GC GTG GC  2: C(P)[A] GCC [T]GC GTG GT | GAA ACA CGG ACA CCC AAA GTA | TCC TCC GGC CCC TGA ATG YGG C | 6, 7 |
| EV | GGC CCC TGA ATG CGG CTA ATC C | GCG ATT GTC ACC ATW AGC AGY CA | CCG ACT ACT TTG GGW GTC CGT GT | 8 |
| HPIV1 | AGT TGT CAA TGT CTT AAT TCG TAT CAA T | TCG GCA CCT AAG TAA TTT TGA GTT | ATA GGC CAA AGA "T"TG TTG TCG AGA CTA TTC CAA | 9 |
| HPIV2 | GCA TTT CCA ATC TAC AGG ACT ATG A | ACC TCC TGG TAT AGC AGT GAC TGA AC | CCA TTT ACC "T"AA GTG ATG GAA TCA ATC GCA AA | 9 |
| HPIV3 | TGG YTC AAT CTC AAC AAC AAG ATT TAA G | TAC CCG AGA AAT ATT ATT TTG CC | CCC RTC TG"T" TGG ACC AGG GAT ATA CTA CAA A | 9 |
| HPIV4 | CTG CCA AAT CGG CAA TTA AAC | CTG GCA GCA ATC ATA AGR TGA TTC | CAT TAT TAT CTC TGC "T"TT CCT TAC AGG CCA CAT CA | 10 |
| RSV | GGC AAA TAT GGA AAC ATA CGT GAA | TCT TTT TCT AGG ACA TTG TAY TGA ACA G | CTG TGT ATG TGG AGC CTT CGT GAA GCT | 11 |
| HMPV | CAA GTG TGA CAT TGC TGA YCT RAA | ACT GCC GCA CAA CAT TTA GRA A | TGG CYG TYA GCT TCA GTC AAT TCA ACA GA | 9 |
| Flu A | CAT GGA RTG GCT AAA GAC AAG ACC | AGG GCA TTT TGG ACA AAK CGT CTA | TGC AGT CCT CGC TCA CTG GGC ACG | 12 |
| Flu B | TCC TCA ACT CAC TCT TCG AGC G | CGG TGC TCT TGA CCA AAT TGG | CCA ATT CGA GCA GCT GAA ACT GCG GTG | 12 |
| Human RNase P | CCA AGT GTG AGG GCT GAA AAG | TGT TGT GGC TGA TGA ACT ATA AAA GG | CC CCA GTC TCT GTC AGC ACT CCC TTC | 9 |
| aMERS-CoV, Middle East respiratory syndrome coronavirus; AdV, adenovirus; HBoV, human bocavirus; HPeV, human parechovirus; HRV, human rhinovirus; EV, enterovirus; HPIV1,2,3,4, human parainfluenza virus 1,2,3,4; RSV, respiratory syncytial virus; HMPV, human metapneumovirus; Flu A, influenza A virus; Flu B, influenza B virus. | | | | |
| #TaqMan® probes are labeled at the 5’-end with the reporter molecule 6-carboxyfluorescein (FAM) and at the 3’-end with the quencher, Black Hole Quencher® 1 (Biosearch Technologies Inc., Novato, CA). | | | | |
| **TaqMan® probes are as above except that they are quenched internally at a modified “T” residue with BHQ1 and a terminal phosphate at the 3’-end to prevent probe extension by Taq polymerase. | | | | |
| **TaqMan® probes are as above except that the reporter molecule is Hexachloro-Fluorescein (HEX) in the HPeV assay. | | | | |
| (P)=dP-CE (pyrimidine derivative); [A]=LNA-dA, [T]=LNA-dT [Locked Nucleic Acid (LNA) primers available from Exiqon, Woburn, MA] | | | | |
| Ambiguity codes: R = A or G; Y = T or C; W = A or T; and S = C or G. | | | | |
| bReferences: |  |  |  |  |
| 1. Dare RK et al 2007. Human coronavirus infections in rural Thailand: a comprehensive study using real-time reverse-transcription polymerase chain reaction assays. J Infect Dis. 2007;196(9):1321-8. | | | | |
| 2. Lu X., et al. 2014. Real-time reverse transcription-PCR assay panel for Middle East respiratory syndrome coronavirus. J Clin Microbiol. 2014;52(1):67-75. | | | | |
| 3. Heim A., et al. 2003. Rapid and quantitative detection of human adenovirus DNA by real-time PCR. J. Med. Virol. 70:228–239. | | | | |
| 4. Lu X., et al. 2006. Real-time PCR assays for detection of bocavirus in human specimens. J Clin Microbiol. 2006;44(9):3231-5. | | | | |
| 5. Nix WA, et al. 2008. Detection of all known parechoviruses by real-time PCR. J Clin Microbiol. 2008 Aug;46(8):2519-24. doi: 10.1128/JCM.00277-08. Epub 2008 Jun 4. | | | | |
| 6. Lu X., et al. 2008. Real-time reverse transcription-PCR assay for comprehensive detection of human rhinoviruses. J. Clin. Microbiol. 46:533–539. | | | | |
| 7. Lu X., et al. 2017. Rhinovirus Viremia in Patients Hospitalized with Community Acquired Pneumonia. J Infect Dis. 2017 Aug 29. doi: 10.1093/infdis/jix455. [Epub ahead of print] | | | | |
| 8. Kilpatrick DR, et al. 2009. Rapid group-, serotype-, and vaccine strain-specific identification of poliovirus isolates by real-time reverse transcription-PCR using degenerate primers and probes F2 deoxyinosine residues. J Clin Microbiol. 2009 Jun;47(6):1939-41. doi: 10.1128/JCM.00702-09. Epub 2009 Apr 22. | | | | |
| 9. Weinberg GA et al. 2013 Field evaluation of TaqMan Array Card (TAC) for the simultaneous detection of multiple respiratory viruses in children with acute respiratory infection.J Clin Virol. 2013 Jul;57(3):254-60. | | | | |
| 10. Sakthivel SK et al. 2012 Comparison of fast-track diagnostics respiratory pathogens multiplex real-time RT-PCR assay with in-house singleplex assays for comprehensive detection of human respiratory viruses J Virol Methods, 185, 259-266 | | | | |
| 11. Fry AM, et al 2010. The burden of hospitalized lower respiratory tract infection due to respiratory syncytial virus in rural Thailand. PLoS One 5:e15098. | | | | |
| 12. Centers for Disease Control and Prevention1Human Influenza Virus Real-time RT-PCR Detection and Characterization Panel. 1510(k) 080570. Sept 30, 2008 | | | | |
