# Supplementary material for: Comprehensive viral enrichment enables sensitive respiratory virus genomic identification and analysis by next generation sequencing
Source: HighWire-hosted journal article supplement (doi:10.1101/gr.226316.117), 2018-04-27
Supplement: Supplemental_Table_S10.docx [file Supplemental_Table_S10.docx]

| **Supplemental Table S10. Targets for the design of conserved viral group enriching probes.** | |
| --- | --- |
| **Viral family/subfamily** | **Genus** |
| ***Coronavirinae*** | *Alphacoronavirus* |
|  | *Betacoronavirus* |
|  | *Deltacoronavirus* |
|  | *Gammacoronavirus* |
| ***Adenoviridae*** | *Aviadenovirus* |
|  | *Atadenovirus* |
|  | *Mastadenovirus* |
|  | *Siadenovirus* |
| ***Parvovirinae*** | *Amdoparvovirus* |
|  | *Aveparvovirus* |
|  | *Bocaparvovirus* |
|  | *Copiparvovirus* |
|  | *Dependoparvovirus* |
|  | *Erythroparvovirus* |
|  | *Tetraparvovirus* |
| ***Polyomaviridae*** | *Alphapolyomavirus* |
|  | *Betapolyomavirus* |
|  | *Deltapolyomavirus* |
|  | *Gammapolyomavirus* |
| ***Reoviridae*** | *Aquareovirus* |
|  | *Coltivirus* |
|  | *Orbivirus* |
|  | *Orthoreovirus* |
|  | *Rotavirus* |
|  | *Seadornavirus* |
| ***Picornviridae*** | *Apthovirus* |
|  | *Cardiovirus* |
|  | *Cosavirus* |
|  | *Dicipivirus* |
|  | *Enterovirus* |
|  | *Erbovirus* |
|  | *Hepatovirus* |
|  | *Kobuvirus* |
|  | *Oscivirus* |
|  | *Parechovirus* |
|  | *Passerivirus* |
|  | *Rosavirus* |
|  | *Sakobuvirus* |
|  | *Salivirus* |
|  | *Sapelovirus* |
| ***Paramyxoviridae*** | *Avulavirus* |
|  | *Henipavirus* |
|  | *Morbillivirus* |
|  | *Respirovirus* |
|  | *Rubulavirus* |
| ***Pneumoviridae*** | *Orthopneumovirus* |
|  | *Metapneumovirus* |
| ***Orthomyxoviridae*** | *Alphainfluenzavirus* |
|  | *Betainfluenzavirus* |
|  | *Gammainfluenzavirus* |
